# Supplementary material
Source: MDPI journal article supplement (https://www.mdpi.com/1999-4907/9/4/219)
Supplement: s1 [file s1]

Table S1: Box-Cox transformation for dependent variables in leaf litter and soil.

|                      | <i>Transformation</i> |              |
|----------------------|-----------------------|--------------|
|                      | Leaf Litter           | Soil         |
| <i>Laccase</i>       | $(y+1)^{-0.1}$        | $y^{-2}$     |
| <i>Peroxidase</i>    | $y^{-0.4}$            | $y^{-1.1}$   |
| <i>Chitinase</i>     | $y^{0.1}$             | $(y+1)^{-2}$ |
| <i>Dehydrogenase</i> | $y^{-0.2}$            | $y^{0.2}$    |
| <i>Cellulase</i>     | $y^{0.2}$             | $y^{-0.4}$   |
| <i>Acid Phosp.</i>   | $y^{0.4}$             | $y^{0.2}$    |
